# Supplementary material for: Folic Acid-Targeted Paclitaxel-Polymer Conjugates Exert Selective Cytotoxicity and Modulate Invasiveness of Colon Cancer Cells
Source: MDPI journal article supplement (doi:10.3390/pharmaceutics13070929), 2021-06-23
Supplement: s1 [file s1]

# Supplementary Materials: Folic Acid-Targeted Paclitaxel-Polymer Conjugates Exert Selective Cytotoxicity and Modulate Invasiveness of Colon Cancer Cells

Antonella Grigoletto, Gabriele Martinez, Daniela Gabbia, Tommaso Tedeschini, Michela Scaffidi, Sara De Martin and Gianfranco Pasut

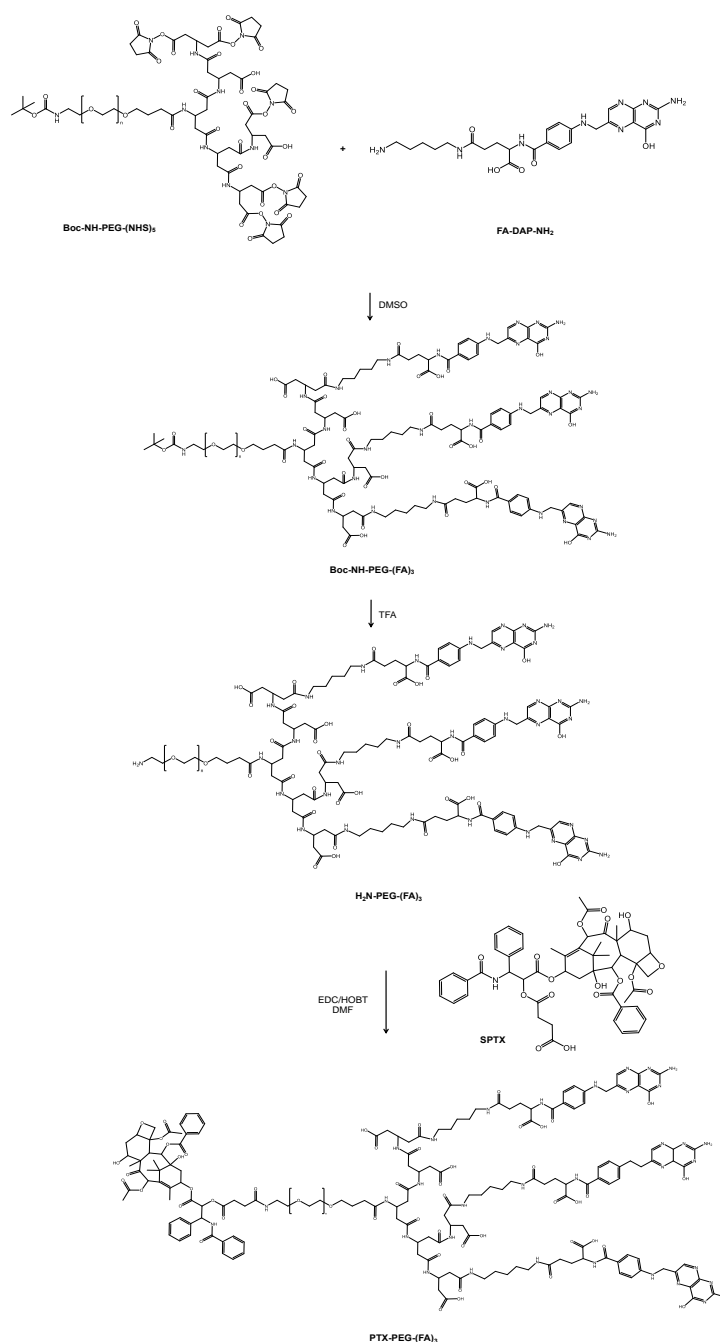

**Figure S1.** Synthesis of PTX-PEG-(FA)<sub>3</sub>. FA = folic acid, DAP = 1,5 di-amino pentane, DMSO = dimethylsulfoxide, EDC = 1-ethyl-3-(3-dimethylaminopropyl)carbodiimide, HOBT = hydroxybenzotriazole, SPTX = succinimidyl paclitaxel.

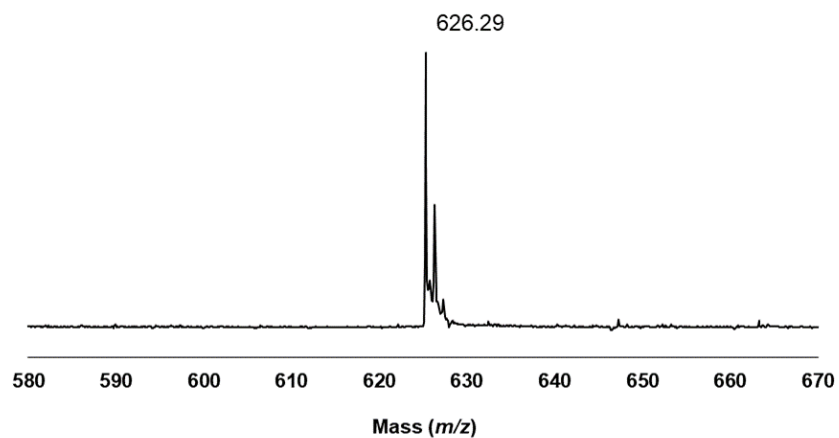

**Figure S2.** ESI-TOF mass spectrometry of Boc-DAP-FA. ESI-MS [ $m/z$ ]: 626.29 ( $M + H$ )<sup>+</sup> [Theoretical mass: 625.29].

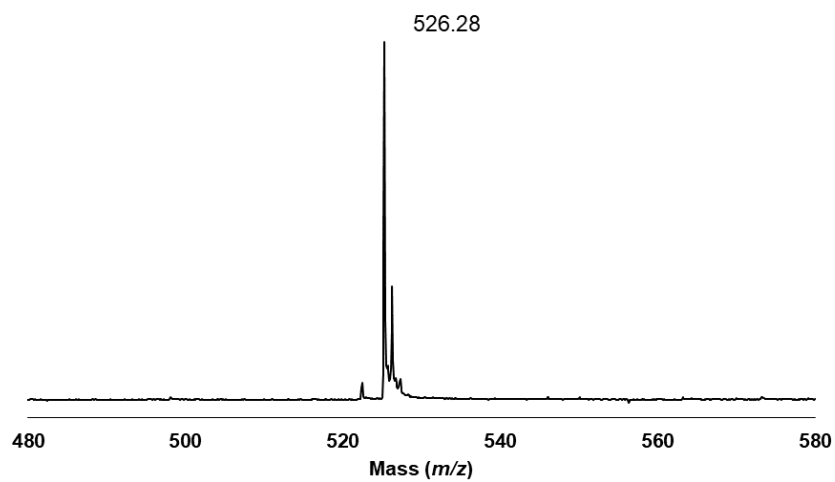

**Figure S3.** ESI-TOF mass spectrometry of FA-DAP-NH<sub>2</sub>. ESI-MS [ $m/z$ ]: 526.28 ( $M + H$ )<sup>+</sup> [Theoretical mass: 525.24].

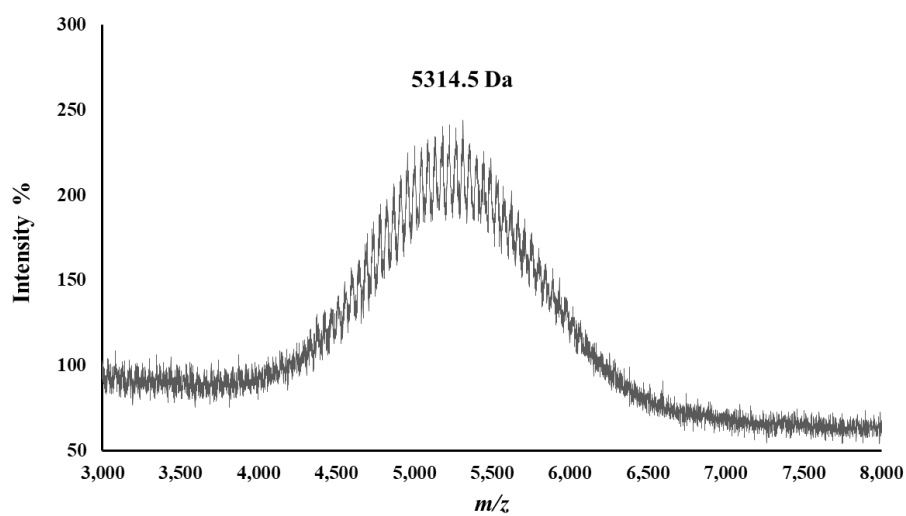

**Figure S4.** MALDI-TOF of Boc-PEG-FA.

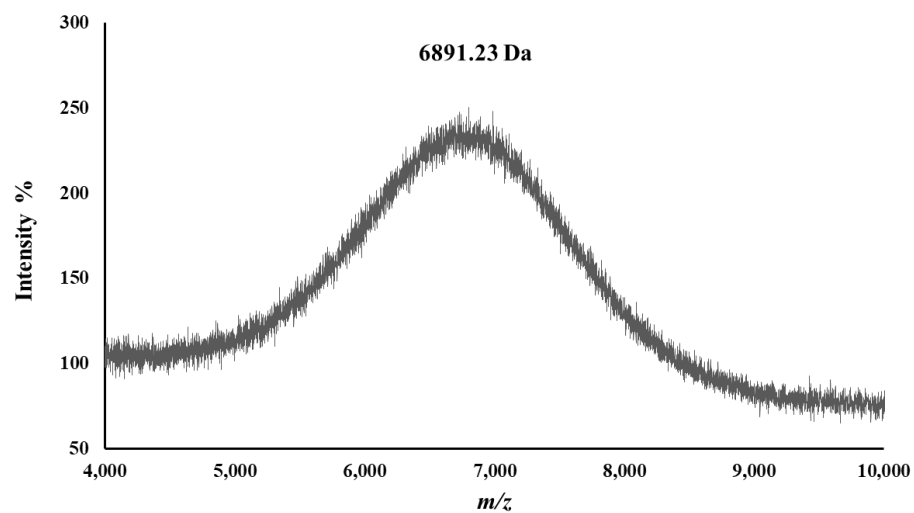

**Figure S5.** MALDI-TOF of Boc-PEG-(FA)<sub>3</sub>.

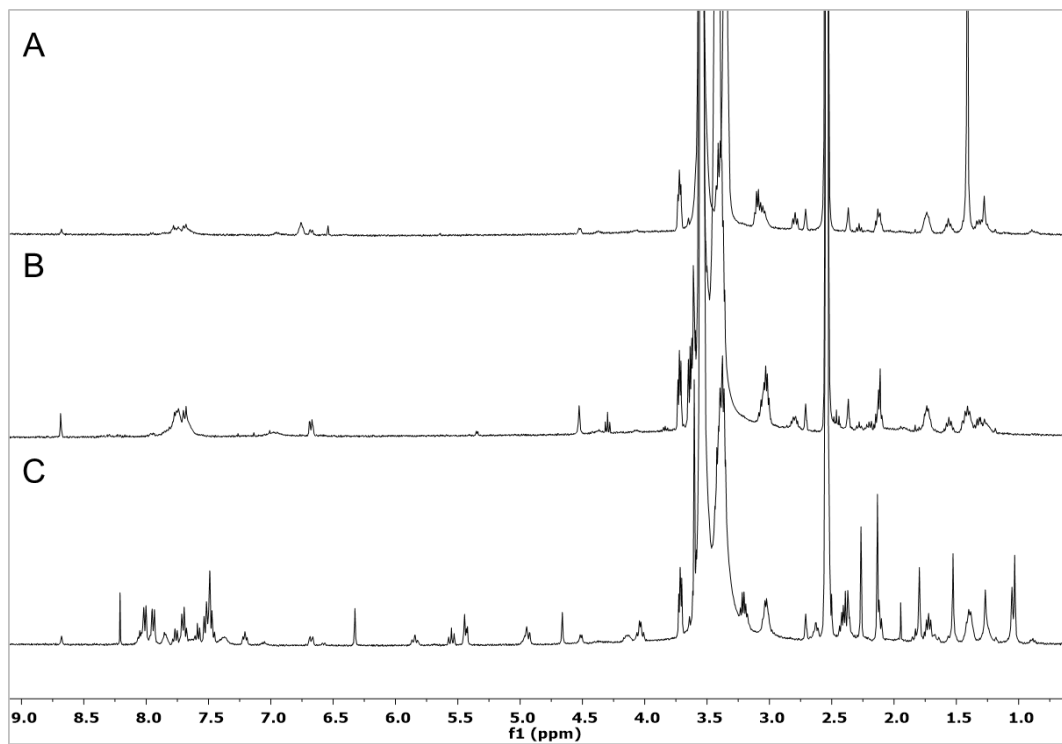

**Figure S6.** Comparison of <sup>1</sup>H-NMR of Boc-PEG-FA (A), H<sub>2</sub>N-PEG-FA (B) and PTX-PEG-FA (C) in (CD<sub>3</sub>)<sub>2</sub>SO.

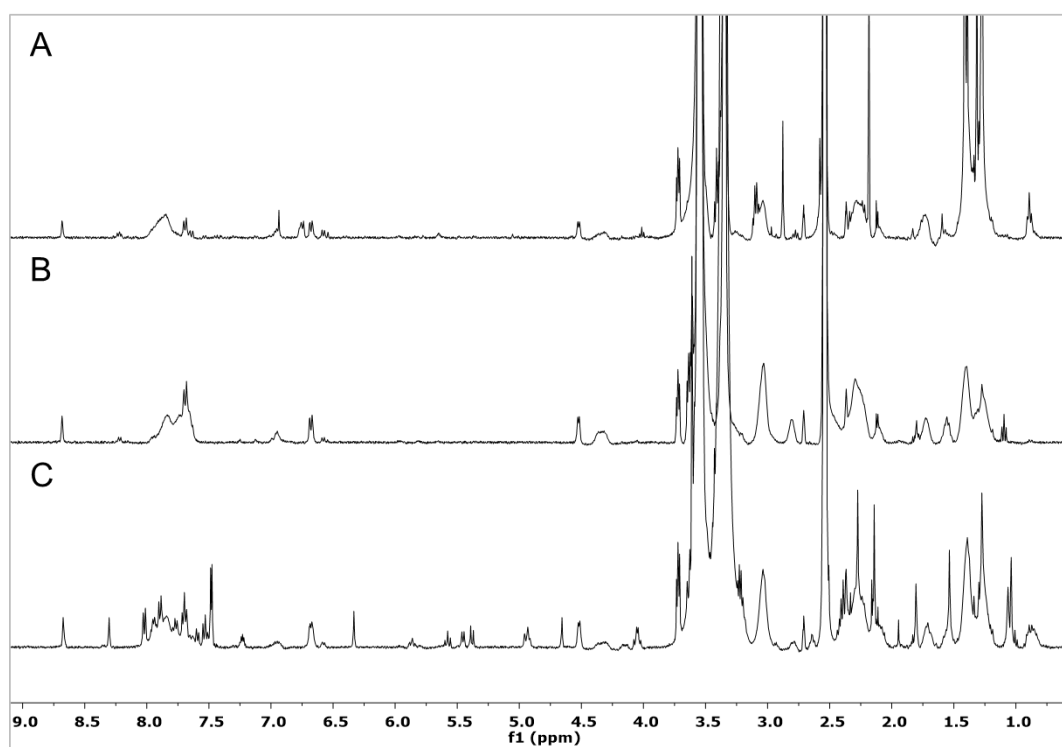

**Figure S7.** Comparison of  $^1\text{H}$ -NMR of Boc-NH-PEG-(FA)<sub>3</sub> (A), H<sub>2</sub>N-PEG-(FA)<sub>3</sub> (B) and PTX-PEG-(FA)<sub>3</sub> (C) in (CD<sub>3</sub>)<sub>2</sub>SO.

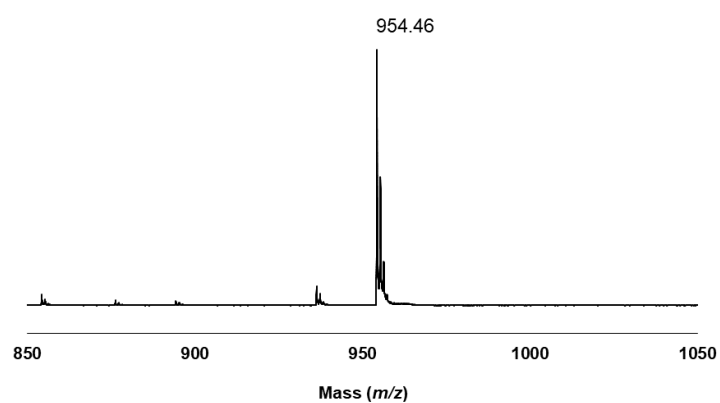

**Figure S8.** ESI-TOF mass spectrometry of SPTX. ESI-MS [ $m/z$ ]: 954.46 ( $M + 1\text{H}$ )<sup>+</sup> [Theoretical mass: 953.35].

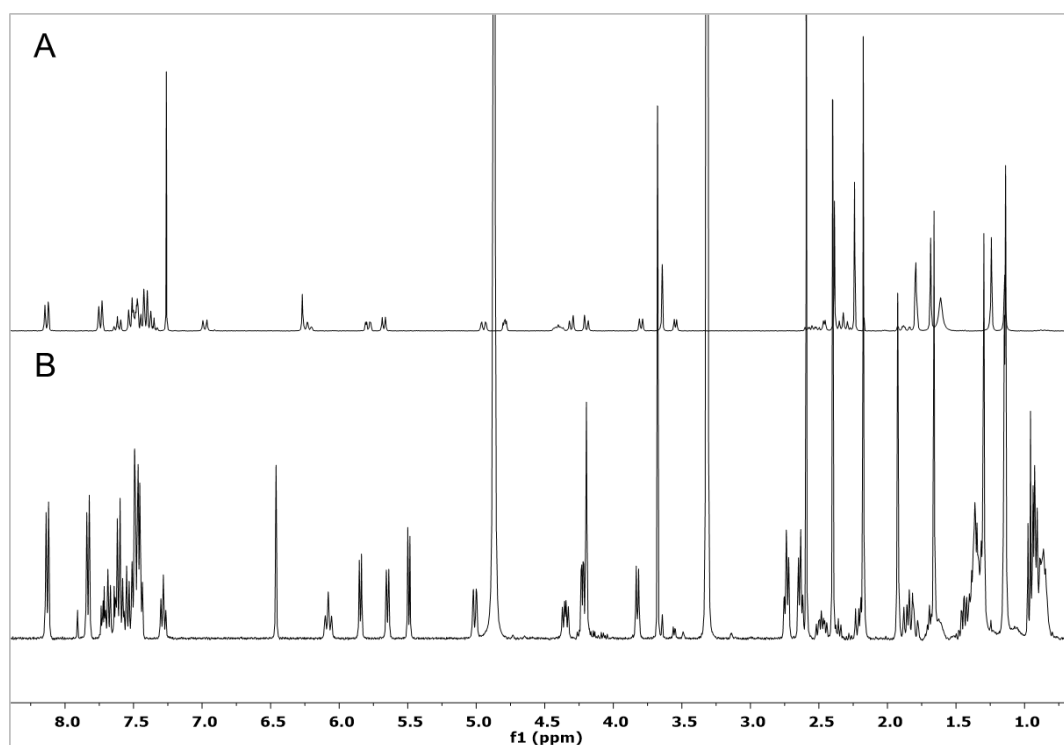

**Figure S9.** Comparison of  $^1\text{H}$ -NMR of PTX (A) and SPTX (B) in  $\text{CD}_3\text{OD}$ .

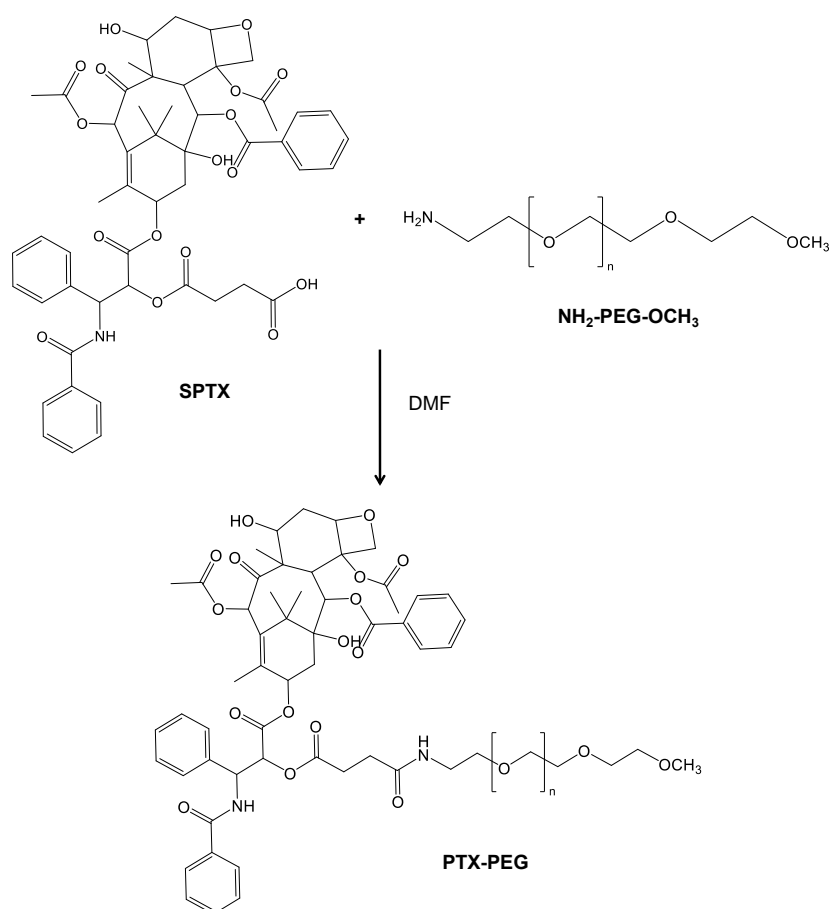

**Figure S10.** Synthesis of PTX-PEG.

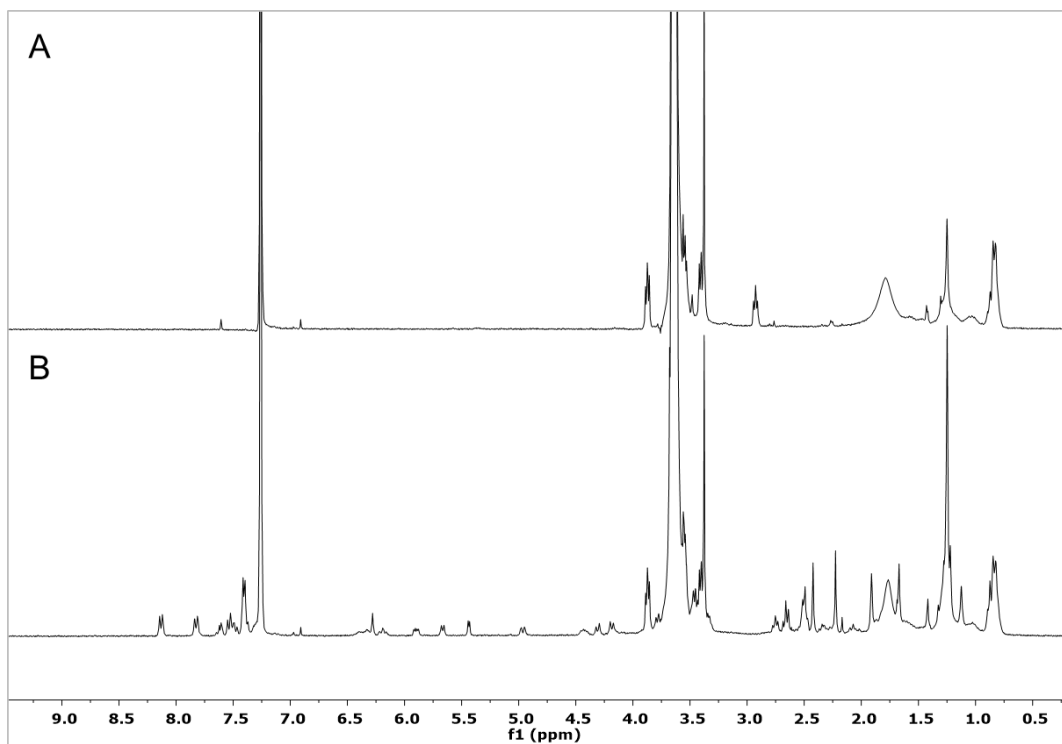

**Figure S11.** Comparison of  $^1\text{H}$ -NMR of mPEG-NH<sub>2</sub> (A) and PTX-PEG (B) in  $\text{CDCl}_3$ .

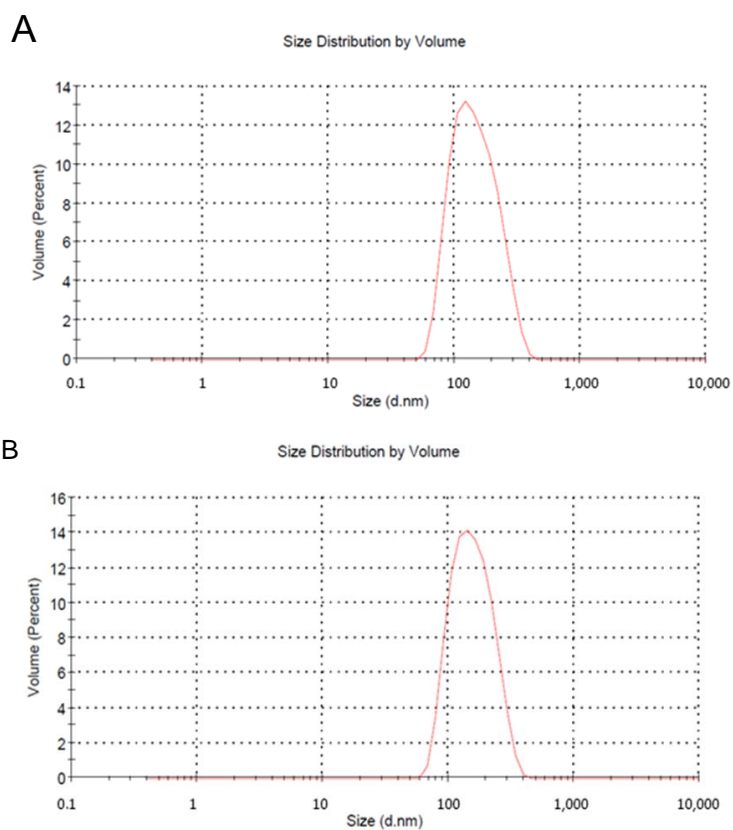

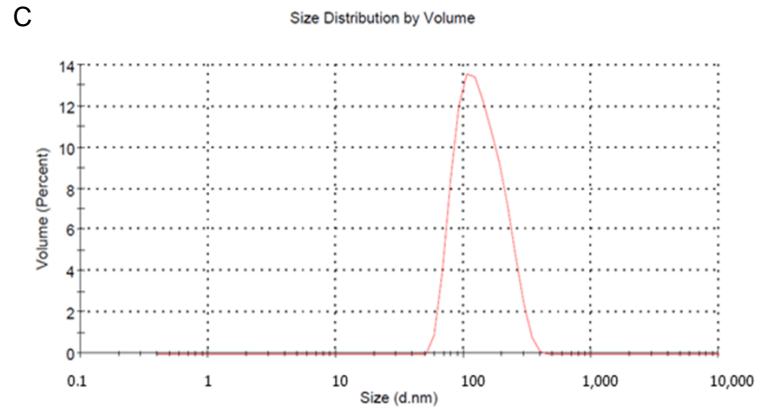

**Figure S12.** Size distribution by DLS of PTX-PEG (A), PTX-PEG-FA (B) and PTX-PEG-(FA)<sub>3</sub> (C).

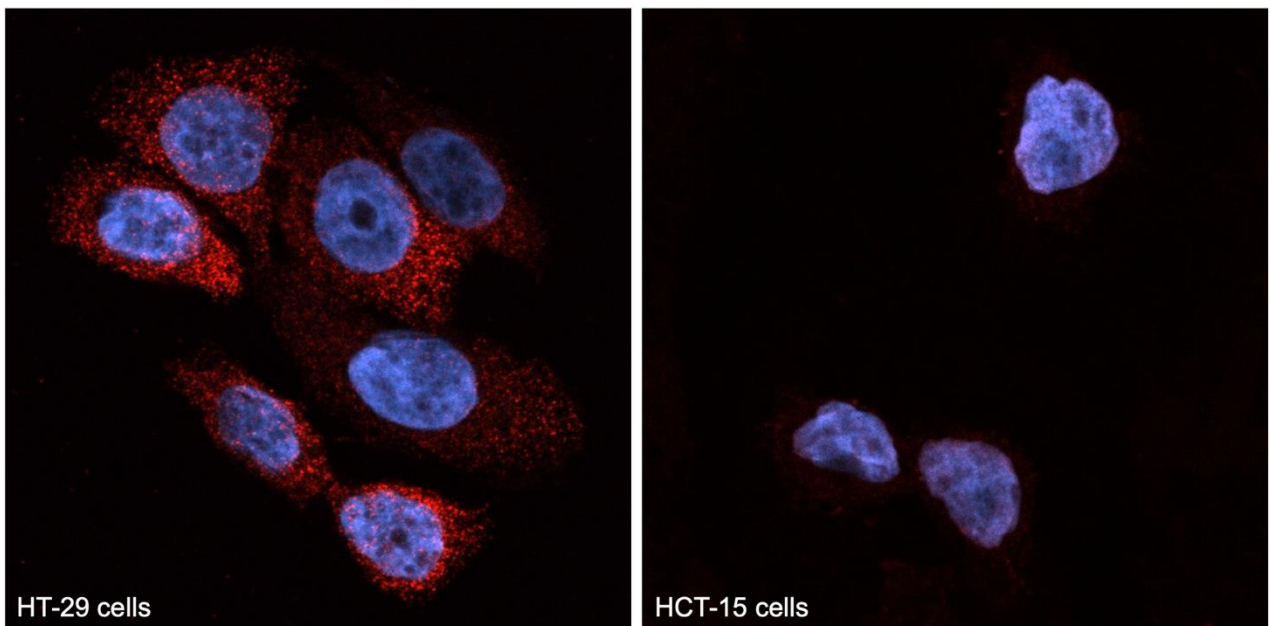

**Figure S13.** Expression level of FA receptors in HT-29 and HCT-15 cell lines. Magnification: 63 $\times$ .
